# Supplementary material
Source: PubMed Central journal article supplement (PMC9059649)

**Supplementary Material for:**

**Combined Varenicline and Naltrexone Attenuates Alcohol Cue-Elicited Activation in Heavy Drinking Smokers**

Erica N. Grodin<sup>1</sup>, Elizabeth M. Burnette<sup>1,2</sup>, ReJoyce Green<sup>1</sup>, Aaron C. Lim<sup>1</sup>, Karen Miotto<sup>3</sup>, Lara A. Ray<sup>1,3,4</sup>

**Supplemental Information:**

**Table S1.** Whole Brain Results for Alcohol vs. Beverage Contrast by Medication Condition

**Figure S1.** Whole Brain Results for Alcohol vs. Beverage Contrast by Medication Condition

**Table S2.** Whole Brain Results for Alcohol Cues by Medication Condition

**Figure S2.** Whole Brain Results for Alcohol Cues by Medication Condition

**Table S3.** Whole Brain Results for Non-Alcoholic Beverage by Medication Condition

**Figure S3.** Whole Brain Results for Non-Alcoholic Beverage by Medication Condition

**Table S1. Whole Brain Results for Alcohol vs. Beverage Contrast by Medication Condition**

| <b>Medication Condition</b> | <b>Voxels</b> | <b>Region</b>                                               | <b>x</b> | <b>y</b> | <b>z</b> | <b>Peak Z</b> | <b>p-value</b> |
|-----------------------------|---------------|-------------------------------------------------------------|----------|----------|----------|---------------|----------------|
| <b>VAR</b>                  | 1212          | L Caudate                                                   | -10      | 16       | 10       | 5.68          | <0.001         |
| <b>VAR + NTX</b>            | N/A           |                                                             |          |          |          |               |                |
| <b>PLAC</b>                 | 5412          | Bilateral Cingulate, Posterior Cingulate, Caudate, Midbrain | -2       | -20      | 34       | 4.88          | <0.001         |
|                             | 2733          | Bilateral mPFC                                              | -4       | 62       | 20       | 4.36          | <0.001         |
|                             | 1917          | L Superior Frontal Gyrus                                    | -6       | 14       | 68       | 4.32          | <0.001         |
|                             | 438           | R Occipital Cortex                                          | 12       | -74      | 0        | 3.90          | 0.01           |
|                             | 367           | L Lateral Occipital Cortex                                  | -42      | -58      | 28       | 3.91          | 0.04           |

VAR = varenicline; VAR+NTX = varenicline and naltrexone; PLAC = placebo; L = left; R = right; Coordinates are in Montreal Neurological Institute (MNI) space.

**Figure S1.** (A) The varenicline only group showed increased activation to alcohol cues relative to beverage cues in the bilateral striatum. (B) There were no brain regions which had increased activation to alcohol cues relative to beverage cues in the combined varenicline + naltrexone group. (C) The placebo group showed increased activation to alcohol cues relative to beverage cues in the prefrontal cortex, striatum, and posterior cingulate. Z-statistic maps are whole-brain cluster corrected,  $Z > 2.3$ ,  $p = .05$ . Coordinates are in Montreal Neurological Institute space. Brain is displayed in radiological convention (L = R).

### A. VAR Only

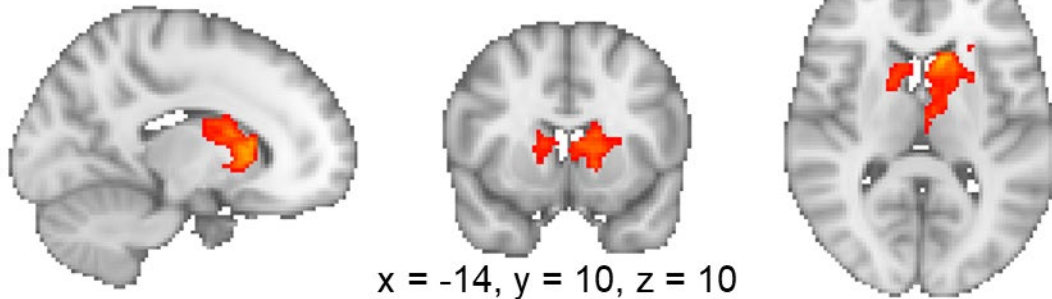

### B. VAR+NTX

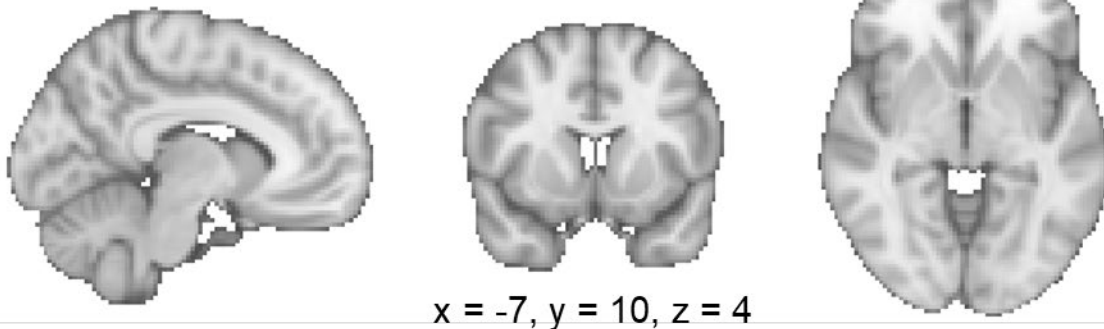

### C. PLAC

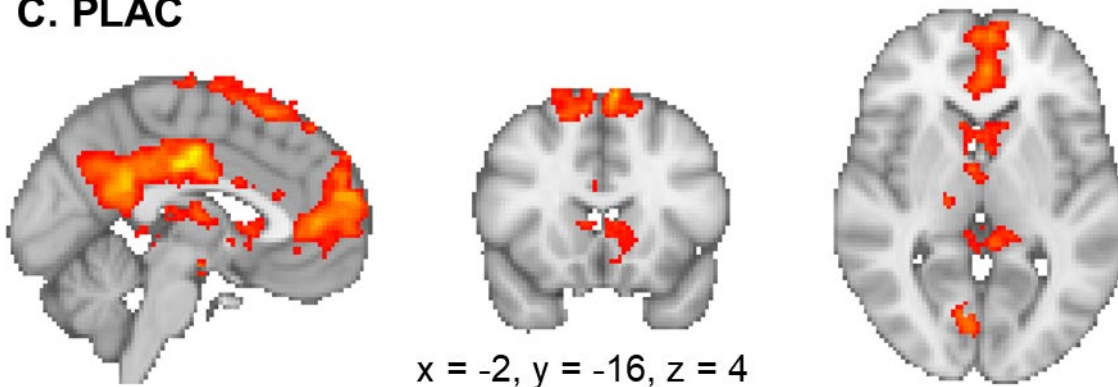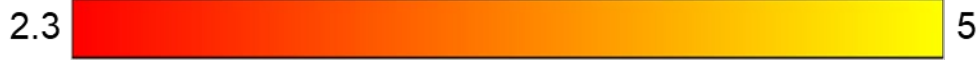

**Table S2. Whole-Brain Group Results Alcohol Cues**

| <b>Comparison</b>               | <b>Voxels</b> | <b>Region</b>                                                                         | <b>X</b> | <b>Y</b> | <b>Z</b> | <b>Peak Z</b> | <b>p-value</b> |
|---------------------------------|---------------|---------------------------------------------------------------------------------------|----------|----------|----------|---------------|----------------|
| <b>Mean Across All Subjects</b> |               |                                                                                       |          |          |          |               |                |
|                                 | 70056         | R Lateral Occipital Cortex /<br>Insula / Ventral Striatum /<br>Putamen / Cingulate    | 40       | -86      | 12       | 7.63          | <0.001         |
|                                 | 4456          | L Superior Frontal Gyrus /<br>mPFC                                                    | -4       | 68       | 30       | 5.76          | <0.001         |
|                                 | 700           | L Orbitofrontal Cortex                                                                | -32      | 34       | -10      | 5.5           | 0.003          |
| <b>VAR</b>                      |               |                                                                                       |          |          |          |               |                |
|                                 | 5300          | R Lateral Occipital Cortex /<br>Temporal Occipital Cortex /<br>Hippocampus            | 40       | -86      | 12       | 6.5           | <0.001         |
|                                 | 3789          | L Superior Frontal Gyrus /<br>Anterior Cingulate / mPFC                               | -12      | 54       | 30       | 5.33          | <0.001         |
|                                 | 2693          | L Occipital Cortex / Temporal<br>Occipital Cortex /<br>Hippocampus                    | -26      | -62      | -6       | 4.47          | <0.001         |
|                                 | 481           | Bilateral Precentral Gyrus                                                            | -6       | -30      | 60       | 3.98          | 0.03           |
| <b>VAR+NTX</b>                  |               |                                                                                       |          |          |          |               |                |
|                                 | 6734          | R Lateral Occipital Cortex /<br>Temporal Occipital Cortex /<br>Hippocampus            | 36       | -88      | 24       | 5.71          | <0.001         |
|                                 | 4947          | L Lateral Occipital Cortex /<br>Temporal Occipital Cortex /<br>Hippocampus            | -28      | -98      | 12       | 5.62          | <0.001         |
|                                 | 1534          | L Superior Frontal Gyrus                                                              | -4       | 68       | 26       | 5.92          | <0.001         |
|                                 | 1221          | Bilateral mPFC                                                                        | 2        | 38       | -18      | 4.59          | <0.001         |
|                                 | 964           | L Orbitofrontal Cortex                                                                | -38      | 42       | -12      | 4.98          | <0.001         |
| <b>PLAC</b>                     |               |                                                                                       |          |          |          |               |                |
|                                 | 7068          | R Temporal Occipital Cortex /<br>Lateral Occipital Cortex /<br>Hippocampus / Thalamus | 30       | -48      | -16      | 6.42          | <0.001         |
|                                 | 2309          | L Temporal Occipital Cortex /<br>Hippocampus / Thalamus                               | -30      | -54      | -12      | 5.93          | <0.001         |
|                                 | 2178          | L Superior Frontal Gyrus /<br>mPFC / Anterior Cingulate                               | -8       | 62       | 20       | 4.31          | <0.001         |
|                                 | 1137          | L Lateral Occipital Cortex                                                            | -20      | -90      | 20       | 4.52          | <0.001         |
|                                 | 680           | L Superior Frontal Gyrus                                                              | -18      | 34       | 56       | 4.95          | 0.004          |
| <b>VAR &gt; VAR+NTX</b>         |               |                                                                                       |          |          |          |               |                |
|                                 | 1246          | R Operculum / Insula /<br>Putamen                                                     | 56       | -22      | 8        | 4.5           | <0.001         |
|                                 | 531           | R Postcentral Gyrus                                                                   | 48       | -34      | 58       | 3.79          | 0.02           |
| <b>VAR + NTX &gt; VAR</b>       |               |                                                                                       |          |          |          |               |                |

N/A

**VAR > PLAC**

N/A

**PLAC > VAR**

N/A

**VAR+NTX > PLAC**

N/A

**PLAC > VAR+NTX**

N/A

---

VAR = varenicline; VAR+NTX = varenicline and naltrexone; PLAC = placebo; L = left; R = right;  
Coordinates are in Montreal Neurological Institute (MNI) space.

Figure S2. Whole-Brain Group Results Alcohol Cues

**A. VAR Only**

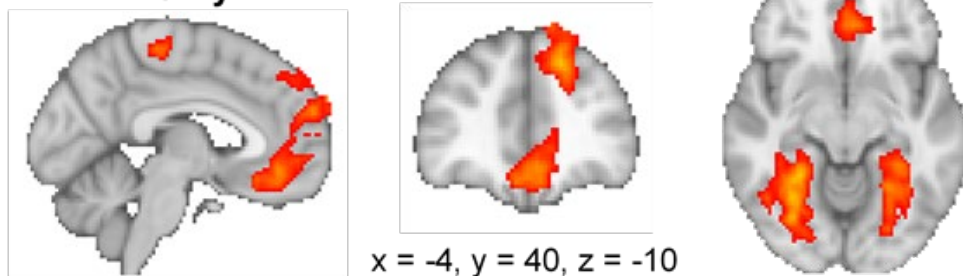

**B. VAR+NTX**

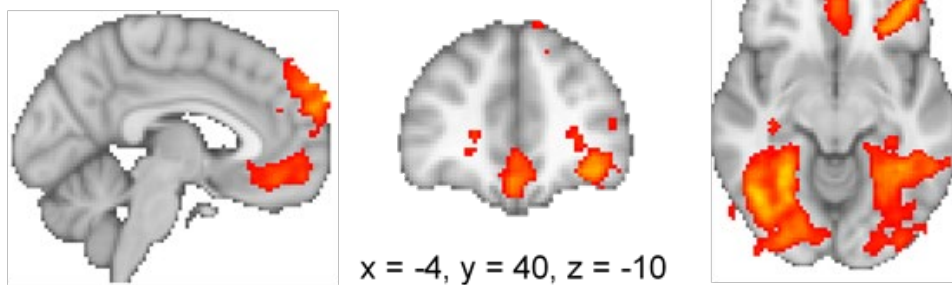

**C. PLAC**

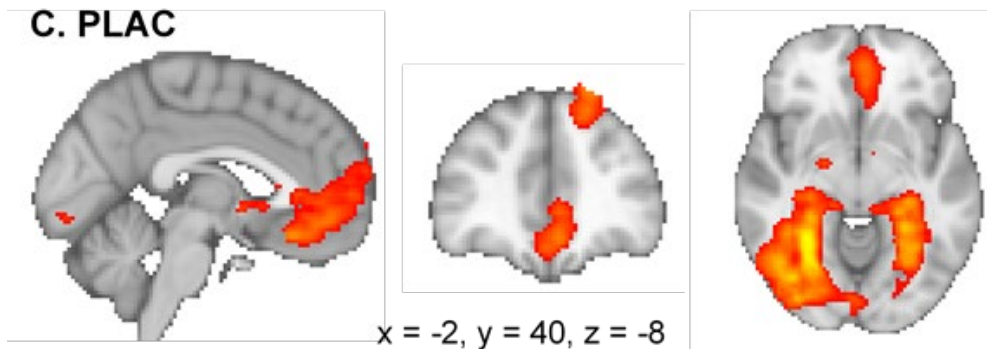

**D. VAR > VAR+NTX**

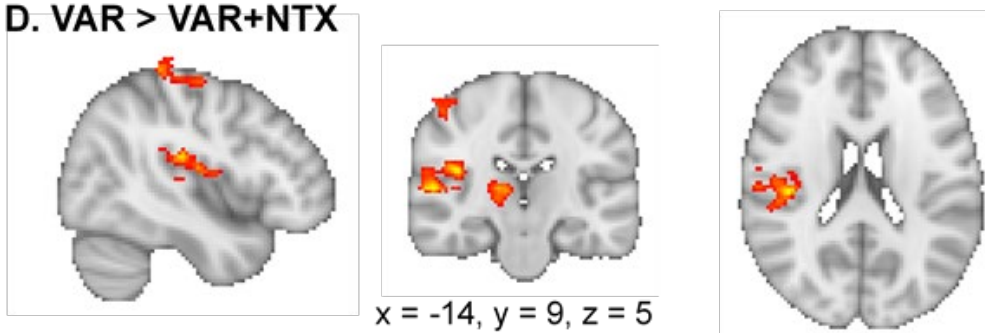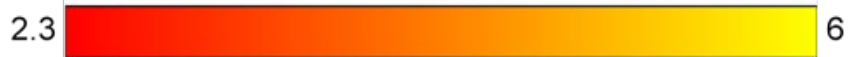

**Table S3. Whole-Brain Group Results Non-Alcoholic Beverage Cues**

| <b>Comparison</b>               | <b>Voxels</b> | <b>Region</b>                                                                             | <b>X</b> | <b>Y</b> | <b>Z</b> | <b>Peak Z</b> | <b>p-value</b> |
|---------------------------------|---------------|-------------------------------------------------------------------------------------------|----------|----------|----------|---------------|----------------|
| <b>Mean Across All Subjects</b> |               |                                                                                           |          |          |          |               |                |
|                                 | 92054         | Bilateral Posterior Cingulate / Occipital Cortex / Insula / Caudate / Putamen / Cingulate | 4        | -22      | 38       | 7.72          | <0.001         |
|                                 | 2421          | L Orbitofrontal Cortex / mPFC                                                             | -28      | 30       | -10      | 6.19          | <0.001         |
| <b>VAR</b>                      |               |                                                                                           |          |          |          |               |                |
|                                 | 4403          | R Lateral Occipital Cortex / Temporal Occipital Cortex / Hippocampus                      | 40       | -86      | 12       | 6.26          | <0.001         |
|                                 | 3161          | L Temporal Occipital Cortex / Occipital Cortex / Hippocampus                              | -30      | -40      | -12      | 4.94          | <0.001         |
|                                 | 1670          | Bilateral Precentral Gyrus                                                                | -6       | -32      | 60       | 5.04          | <0.001         |
|                                 | 1369          | L Superior Frontal Gyrus                                                                  | -20      | 36       | 38       | 4.43          | <0.001         |
|                                 | 877           | Bilateral mPFC / Anterior Cingulate Cortex                                                | -6       | 32       | -14      | 4.05          | <0.001         |
| <b>VAR+NTX</b>                  |               |                                                                                           |          |          |          |               |                |
|                                 | 6754          | R Lateral Occipital Cortex / Temporal Occipital Cortex / Hippocampus / Thalamus           | 38       | -86      | 12       | 6.29          | <0.001         |
|                                 | 5940          | L Lateral Occipital Cortex / Temporal Occipital Cortex / Hippocampus                      | -38      | -86      | 6        | 5.66          | <0.001         |
|                                 | 1716          | L Orbitofrontal Cortex / Middle Frontal Gyrus                                             | -34      | 38       | -10      | 5.65          | <0.001         |
|                                 | 1009          | L Superior Frontal Gyrus                                                                  | -6       | 62       | 38       | 5.45          | <0.001         |
|                                 | 705           | Bilateral mPFC / Anterior Cingulate Cortex                                                | 0        | 34       | -18      | 4.63          | 0.003          |
| <b>PLAC</b>                     |               |                                                                                           |          |          |          |               |                |
|                                 | 4988          | R Temporal Occipital Cortex / Occipital Cortex / Parahippocampus                          | 30       | -60      | -8       | 6.04          | <0.001         |
|                                 | 2372          | L Temporal Occipital Cortex / Occipital Cortex / Parahippocampus                          | -30      | -54      | -12      | 5.39          | <0.001         |
|                                 | 861           | L Orbitofrontal Cortex / mPFC / Anterior Cingulate Cortex                                 | -28      | 30       | -10      | 4.59          | <0.001         |
| <b>VAR &gt; VAR+NTX</b>         |               |                                                                                           |          |          |          |               |                |
|                                 | 1426          | R Postcentral Gyrus                                                                       | 28       | -30      | 76       | 5.26          | <0.001         |
|                                 | 709           | L Parietal Operculum / Insula                                                             | 48       | -22      | 22       | 4.36          | 0.003          |
| <b>VAR + NTX &gt; VAR</b>       |               |                                                                                           |          |          |          |               |                |

|                          |      |                                  |     |     |     |      |        |
|--------------------------|------|----------------------------------|-----|-----|-----|------|--------|
|                          | 530  | Lateral Occipital Cortex         | 50  | -62 | -20 | 3.51 | 0.02   |
| <b>VAR &gt; PLAC</b>     |      |                                  |     |     |     |      |        |
|                          | 4015 | R Postcentral Gyrus              | 16  | -42 | 66  | 4.58 | <0.001 |
|                          | 1940 | R Precentral Gyrus               | 66  | -2  | 28  | 4.57 | <0.001 |
|                          | 1575 | L Parietal Operculum / Insula    | -42 | -34 | 18  | 4.64 | <0.001 |
| <b>PLAC &gt; VAR</b>     |      |                                  |     |     |     |      |        |
|                          | N/A  |                                  |     |     |     |      |        |
| <b>VAR+NTX &gt; PLAC</b> |      |                                  |     |     |     |      |        |
|                          | 818  | R Temporal Pole                  | 54  | 10  | -28 | 3.63 | <0.001 |
|                          | 594  | R Lateral Occipital Cortex       | 26  | -88 | 26  | 4.00 | 0.008  |
|                          | 545  | Bilateral Superior Frontal Gyrus | 0   | 56  | 34  | 4.29 | 0.01   |
|                          | 543  | L Middle Frontal Gyrus           | -50 | 12  | 46  | 3.74 | 0.01   |
|                          | 509  | L Precentral Gyrus               | -14 | 30  | 72  | 3.71 | 0.02   |
|                          | 448  | L Lateral Occipital Cortex       | -26 | -86 | 32  | 3.82 | 0.04   |
| <b>PLAC &gt; VAR+NTX</b> |      |                                  |     |     |     |      |        |
|                          | N/A  |                                  |     |     |     |      |        |
| <b>Age +</b>             |      |                                  |     |     |     |      |        |
|                          | N/A  |                                  |     |     |     |      |        |
| <b>Age -</b>             |      |                                  |     |     |     |      |        |
|                          | N/A  |                                  |     |     |     |      |        |

---

VAR = varenicline; VAR+NTX = varenicline and naltrexone; PLAC = placebo; L = left; R = right; Coordinates are in Montreal Neurological Institute (MNI) space.



**Figure S3. Whole-Brain Group Results Non-Alcoholic Beverage Cues**

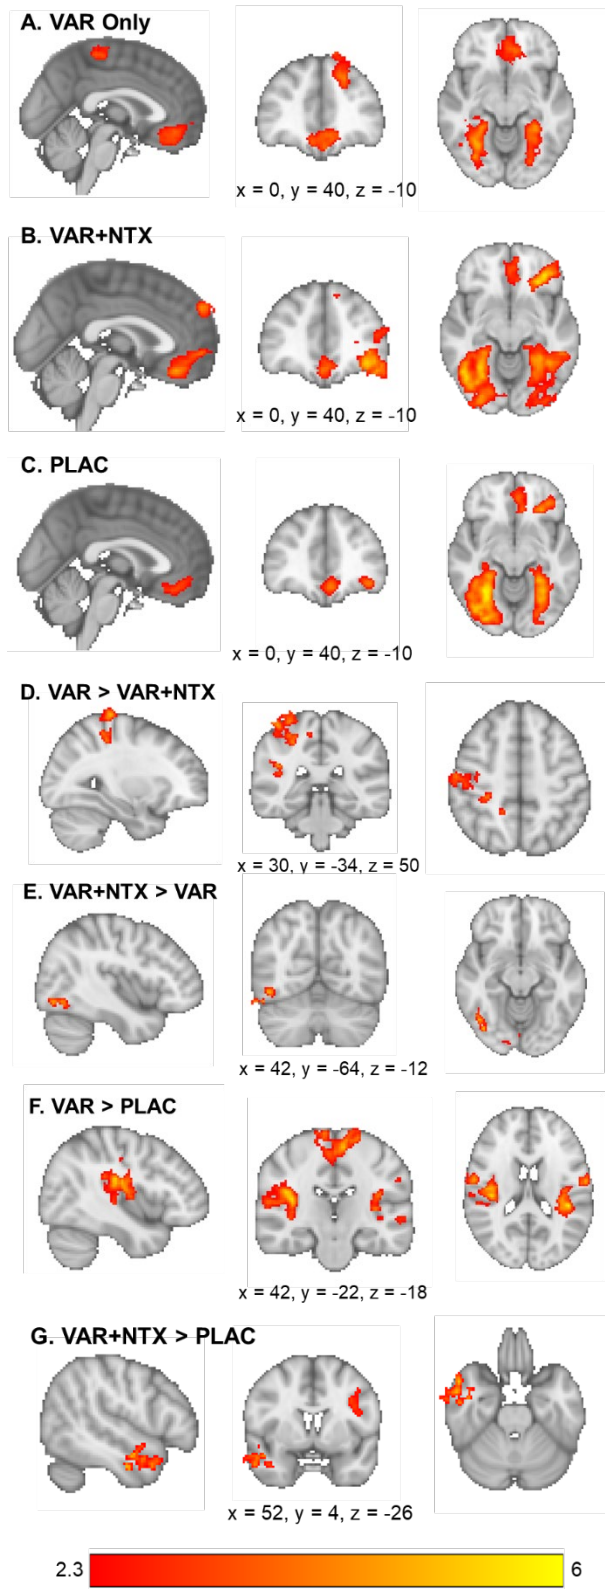

Supplement: NIHMS1790629-supplement-Supp_1.pdf [file NIHMS1790629-supplement-Supp_1.pdf]
